# Supplementary material for: Sea-surface temperature extremes during the last interglacial
Source: Research Square preprint supplement (doi:10.21203/rs.3.rs-8280786/v1), 2025-12-15
Supplement: Supplementary file 1 [file a9bcee54e908d20cee2e378b.docx]

Supplementary material to:

Sea-surface temperature extremes during the last interglacial

Torin Cannings1, Erica de Leau2, Stephanie Stainbank1, László Kocsis3, Dick Kroon2🎗, Silvia Spezzaferri4🎗, Elias Samankassou1

1Department of Earth Sciences, University of Geneva, Rue des Maraîchers 13, 1205 Geneva, Switzerland
2 School of GeoSciences, Grant Institute, University of Edinburgh, James Hutton Road, Edinburgh EH9 3FE, UK

3Institute of Earth Surface Dynamics (IDYST), University of Lausanne, Quartier UNIL-Mouline, Bâtiment Géopolis, 1015 Lausanne, Switzerland

4Department of Geosciences, University of Fribourg, Chemin du Musée 6, 1700 Fribourg, Switzerland

Correspondence to: torin.cannings@unige.ch


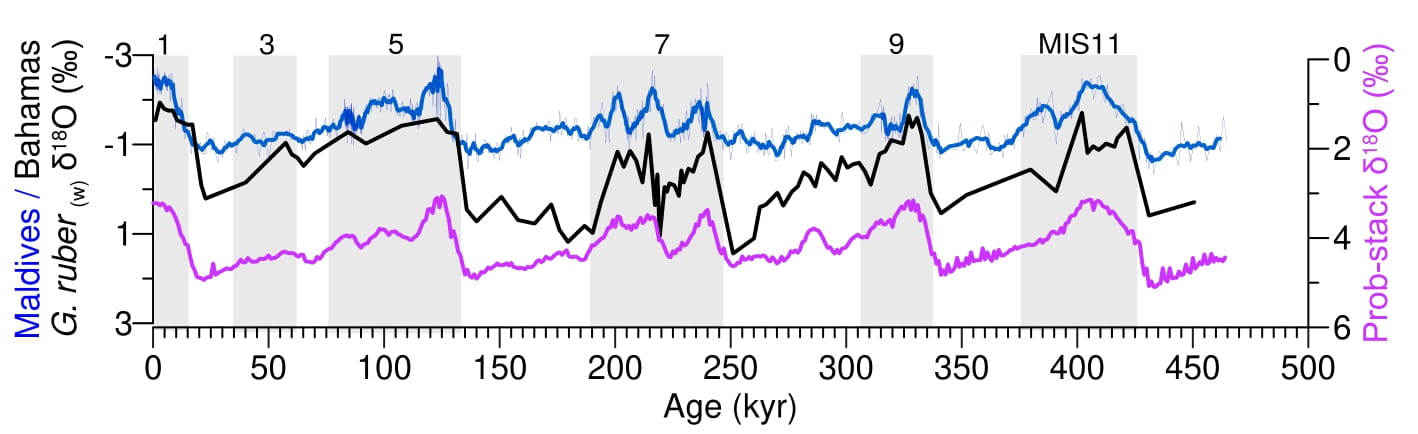


Supplementary Figure – Long-term ‘pooled’ G. ruber oxygen isotope records for both site U1467 (Maldives) and 1006 (Bahamas) shown relative to the Prob-stack reference curve1.


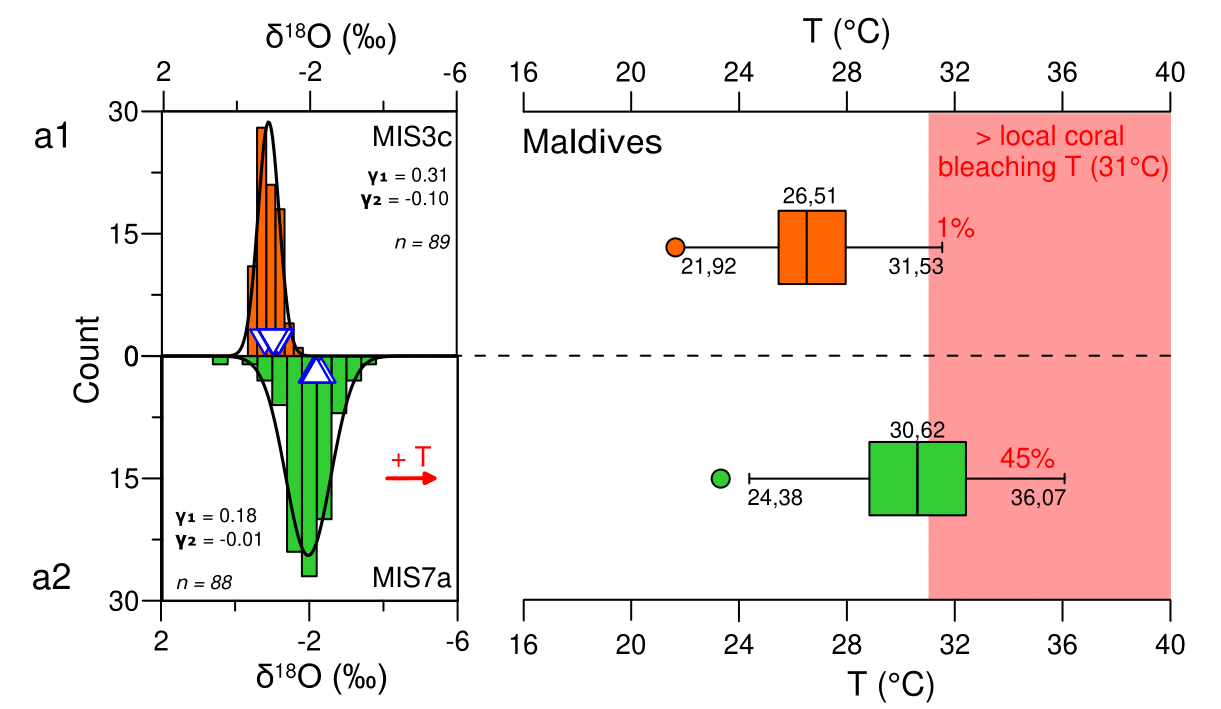


Supplementary Figure 2 – Spread in δ18Oc values from individual foraminiferal analyses (IFA) and the associated seawater temperature estimates. Panels show histograms of δ18Oc (counts represent individual measurements) with temperature box and whisker plots for G. ruber from two intervals: MIS3c (a1) and MIS7a (a2) from the Maldives. Pooled δ18Oc values (triangles) are shown for each sample. Y1 = Skewness, Y2 = Kurtosis and n = total number of measurements. All δ18Oc values are reported relative to VDPB. Box and whisker plots include labelled upper and lower bounds and mean values. The percentage of IFA-derived temperatures exceeding the modern coral-bleaching threshold is highlighted in bold red.


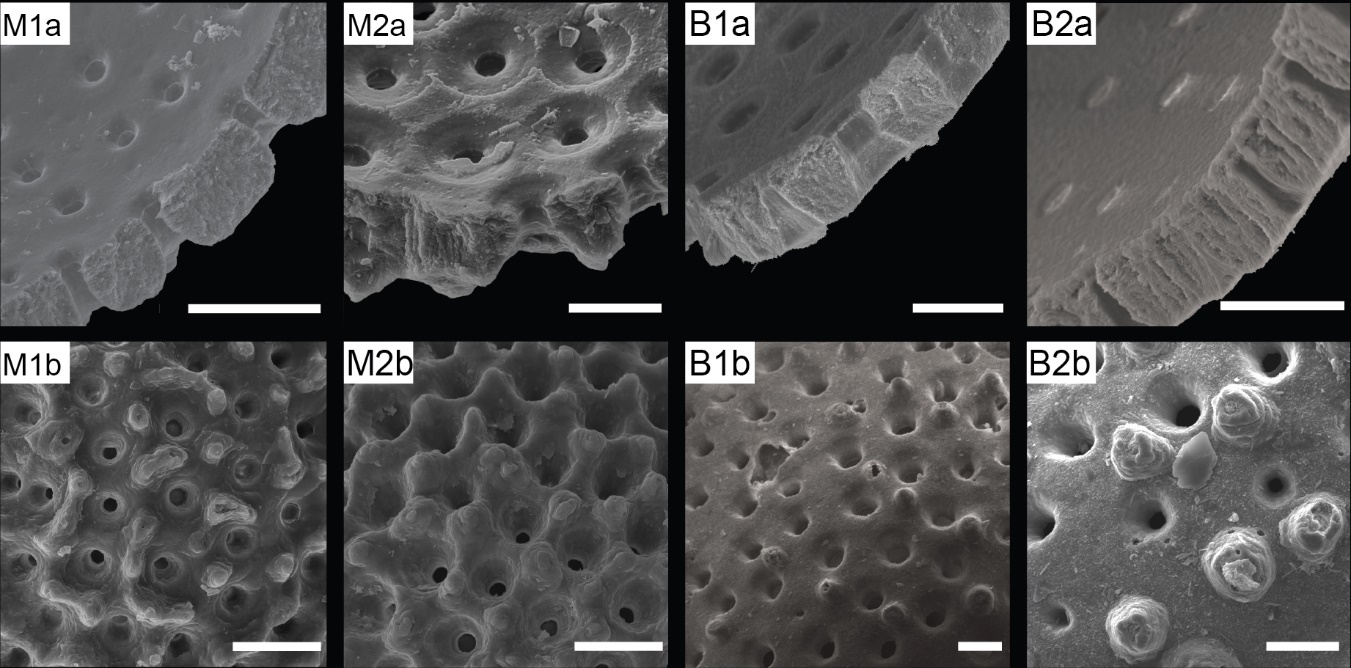


Supplementary Figure 3 – Scanning electron microscope (SEM) images showing preservation quality in representative G. ruber specimens from IODP Site U1467 in the Maldives and ODP Site 1006 off the Bahamas. Maldives samples include A, B-Mudline (M1) C-1H-1, 99–100 cm (M2). Bahamas samples are from A-1H-1, 55–57 cm and A-1H-3, 15–17 cm. For each specimen, panel ‘a’ shows a cross-section with the inner surface and panel ‘b’ shows the external test surface. Images from Site U1467 are from Stainbank, et al. 2, who provide a detailed assessment of preservation and diagenesis at that site. Scale bars for all images = 10 μm.


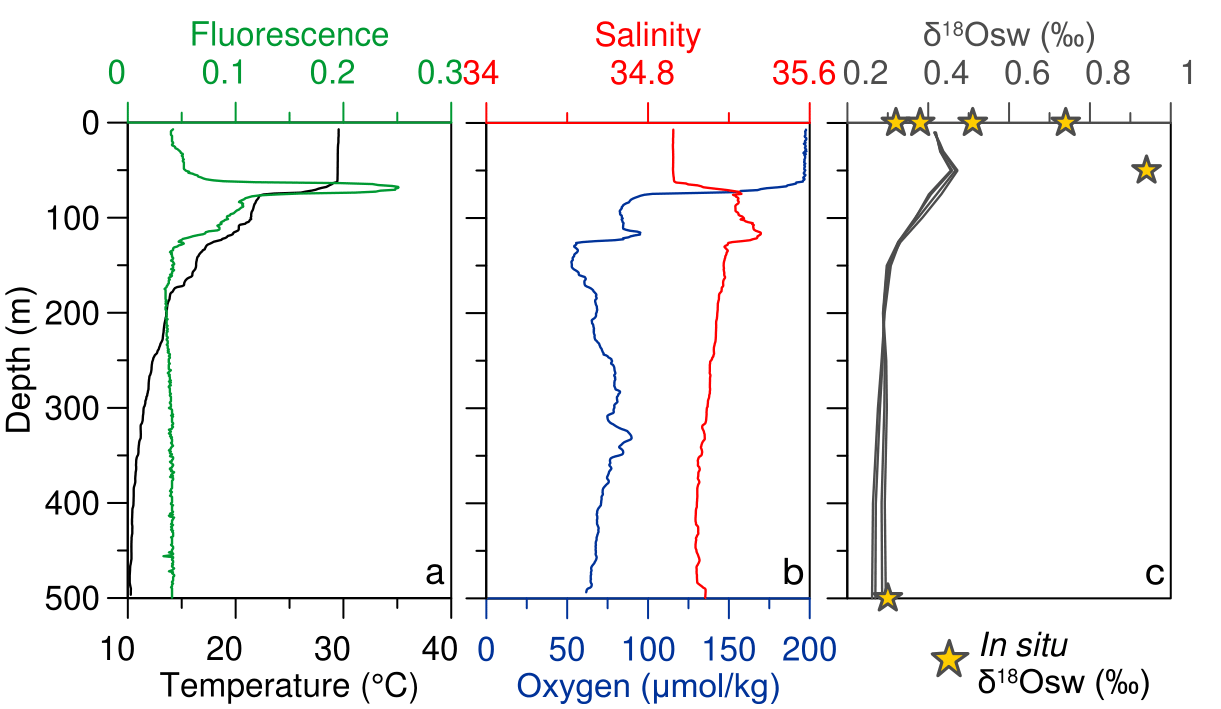


Supplementary Figure 4 – Physical oceanographic data showing profiles of temperature (black), fluorescence (green), salinity (red), Oxygen (blue) and δ¹⁸Osw (grey) relative to depth for the modern Maldives 3. In situ δ¹⁸Oswvalues4-8 are shown by yellow stars.

The methodological workflow used in this research utilises Mg/Ca-based temperature estimates in order to calculate an estimated value for the δ18O seawater (δ18Osw). This method ensures that the temperature estimates from individual foraminifera analysis (IFA) use a δ18Osw value which is relevant to the conditions when each foraminifera produced its carbonate test. This is important as δ18Osw can vary with numerous factors such as local hydrography and depth, which are not accounted for by climate or latitude-based δ18Osw estimates, as shown in Supplementary Figure 4, which demonstrates δ18Osw variation with depth in the modern Maldives. The δ18Osw calculated in this study are consistently more positive than climate and latitude-based estimates (Supplementary Table 2). The estimates shown in Supplementary Table 2 were estimated from the benthic δ18O stack of Lisiecki and Raymo 9 using the multi-proxy sea level model from Rohling, et al. 10. A latitude adjustment for the δ18Osw estimation was made using 11 Eq. S9.

We attribute this difference to the fact that such estimates do not account for depth-based variation in δ18Osw. Data from the modern Maldives demonstrates that δ18Osw values become more positive for much of the depth habitat of *G. ruber* (*c.* 0 – 50 m) than at the surface or bottom water, resulting in a discrepancy between calculated values and estimates of surface or bottom water δ18Osw. The corresponding temperature profile (Supplementary Figure 4) highlights that despite this change in δ18Osw with depth, temperature is consistent from the surface, throughout the depth habitat of the planktic foraminifera species analysed (*G. ruber*).

Supplementary Table – Traditional pooled whole shell geochemical data from all intervals discussed from both sites.

| **Location** | **Interval** | **Sample** | **δ18O (‰)** | **Mg/Ca (mmol/mol)** |
| --- | --- | --- | --- | --- |
| Maldives (IODP 359 U1467) | MIS3c | U1467C, 1H2, 7–8 cm | -0.97 | 6.28 |
| -1.13 |  |
| U1467C, 1H2, 10–11 cm | -0.76 |  |
| -0.97 |  |
| U1467C, 1H2, 13–14 cm | -1.15 | 5.40 |
| -0.99 |  |
| MIS5e | U1467B, 2H1, 115–116 cm | -2.48 | 7.35 |
| -2.20 |  |
| U1467B, 2H1, 118–119 cm | -2.02 |  |
| -2.62 |  |
| U1467B, 2H1, 121–122 cm | -2.51 | 6.16 |
| MIS7a | U1467B, 2H3, 63–64 cm | -2.31 | 7.86 |
| -2.11 |  |
| U1467B, 2H3, 66–67 cm | -2.15 |  |
| U1467B, 2H3, 69–70 cm | -2.18 | 8.98 |
| Bahamas (ODP 166 1006) | MIS1 | 1006A, 1H1, 35–37 cm | -1.85 | 5.09 |
| -1.81 |  |
| 1006A, 1H1, 55–57 cm | -1.47 | 5.01 |
| -1.79 |  |
| 1006A, 1H1, 75–77 cm | -1.74 |  |
| -1.70 |  |
| MIS5e | 1006A, 1H2, 135–137 cm | -1.45 |  |
| -1.58 |  |
| 1006A, 1H3, 15–17 cm | -1.83 | 5.66 |
| -2.15 |  |
| 1006A, 1H3, 35–37 cm | -1.66 | 5.90 |
| -1.40 |  |

Supplementary Table - Mean δ18Osw estimates for each time interval calculated using the mean G. ruber (w) Mg/Ca derived temperatures together with the traditional ‘pooled’ δ18O data together with climate and latitude-based estimates (see supplementary text).

| **Location** | **Interval** | **δ18Osw calculated** | **δ18Osw climate & latitude-based estimate (see text)** |
| --- | --- | --- | --- |
| Maldives (IODP 359 U1467) | MIS3c | 2.09 | 1.03 |
| MIS5e | 0.99 | 0.47 |
| MIS7a | 1.58 | 0.56 |
| Bahamas (ODP 166 1006) | MIS1 | 0.98 | 0.43 |
| MIS5e | 1.64 | 0.41 |

Supplementary Table - Statistical overview of all δ18Oc Individual Foraminifera Analyses (IFA) datasets for each site and interval. SE = standard error, SD = standard deviation

| **Location** | **Interval** | **#** | **Mean** | **SE of the mean** | **SD** | ***p* Value Shapiro** | **Skewness** |
| --- | --- | --- | --- | --- | --- | --- | --- |
| Maldives (IODP 359 U1467) | MIS3c | 98 | -0.75 | 0.04 | 0.39 | 0.35 | 0.31 |
| MIS5e | 123 | -2.31 | 0.09 | 0.99 | 0.00* | 0.59 |
| MIS7a | 88 | -2.00 | 0.05 | 0.50 | 0.81 | 0.18 |
| Bahamas (ODP 166 1006) | MIS1 | 82 | -1.69 | 0.04 | 0.37 | 0.48 | 0.09 |
| MIS5e | 114 | -1.91 | 0.04 | 0.47 | 0.26 | 0.34 |

Supplementary Table - Temperature estimates for the Individual Foraminifera Analyses (IFA) (excluding identified outliers) and pooled analysis using the combined δ18O & Mg/Ca method.

| **Location** | **Interval** |  | **Temperature (°C)** |
| --- | --- | --- | --- |
| Maldives (IODP 359 U1467) | MIS3c | IFA Maximum | 31.53 |
| IFA Minimum | 21.64 |
| Pooled Mean (± SD) | 27.48 ± 0.77 |
| MIS5e | IFA Maximum | 39.74 |
| IFA Minimum | 17.43 |
| Pooled Mean (± SD) | 28.90 ± 0.87 |
| MIS7a | IFA Maximum | 36.07 |
| IFA Minimum | 23.32 |
| Pooled Mean (± SD) | 31.07 ± 0.51 |
| Bahamas (ODP 166 1006) | MIS1 | IFA Maximum | 29.84 |
| IFA Minimum | 21.52 |
| Pooled Mean (± SD) | 26.46 ± 0.08 |
| MIS5e | IFA Maximum | 35.88 |
| IFA Minimum | 23.53 |
| Pooled Mean (± SD) | 27.78 ± 0.2 |

# References

1 Ahn, S., Khider, D., Lisiecki, L. E. & Lawrence, C. E. A probabilistic Pliocene–Pleistocene stack of benthic δ18O using a profile hidden Markov model. *Dynamics and Statistics of the Climate System* **2** (2017). <https://doi.org/10.1093/climsys/dzx002>

2 Stainbank, S. *et al.* Assessing the impact of diagenesis on foraminiferal geochemistry from a low latitude, shallow-water drift deposit. *Earth and Planetary Science Letters* **545** (2020). <https://doi.org/10.1016/j.epsl.2020.116390>

3 Krahmann, G. & Krüger, K. Physical oceanography during SONNE cruise SO235. (2018). <https://doi.org/10.1594/PANGAEA.887805>

4 Srivastava, R., Ramesh, R., Prakash, S., Anilkumar, N. & Sudhakar, M. Oxygen isotope and salinity variations in the Indian sector of the Southern Ocean. *Geophysical Research Letters* **34** (2007). <https://doi.org/10.1029/2007gl031790>

5 Singh, A., Jani, R. A. & Ramesh, R. Spatiotemporal variations of the δ O-salinity relation in the northern Indian Ocean. *Deep-Sea Research Part I-Oceanographic Research Papers* **57**, 1422-1431 (2010). <https://doi.org/10.1016/j.dsr.2010.08.002>

6 Duplessy, J. C., Be, A. W. H. & Blanc, P. L. Oxygen and Carbon Isotopic Composition and Biogeographic Distribution of Planktonic-Foraminifera in the Indian-Ocean. *Palaeogeogr Palaeocl* **33**, 9-46 (1981). <https://doi.org/10.1016/0031-0182(81)90031-6>

7 Dahl, K. A. & Oppo, D. W. Sea surface temperature pattern reconstructions in the Arabian Sea. *Paleoceanography* **21** (2006). <https://doi.org/10.1029/2005pa001162>

8 Blättler, C. L., Higgins, J. A. & Swart, P. K. Advected glacial seawater preserved in the subsurface of the Maldives carbonate edifice. *Geochimica et Cosmochimica Acta* **257**, 80-95 (2019). <https://doi.org/10.1016/j.gca.2019.04.030>

9 Lisiecki, L. E. & Raymo, M. E. A Pliocene‐Pleistocene stack of 57 globally distributed benthic δ18O records. *Paleoceanography* **20** (2005). <https://doi.org/10.1029/2004PA001071>

10 Rohling, E. J. *et al.* Sea level and deep-sea temperature reconstructions suggest quasi-stable states and critical transitions over the past 40 million years. *Science Advances* **7** (2021). <https://doi.org/10.1126/sciadv.abf5326>

11 Gaskell, D. E. *et al.* The latitudinal temperature gradient and its climate dependence as inferred from foraminiferal δ18O over the past 95 million years. *Proceedings of the National Academy of Sciences* **119**, e2111332119 (2022). <https://doi.org/10.1073/pnas.2111332119>
