# Supplementary figures and images for: Sea-surface temperature extremes during the last interglacial
Source: Research Square preprint supplement (doi:10.21203/rs.3.rs-8280786/v1), 2025-12-15

Maldives / Bahamas

G. ruber <sub>(w)</sub>  $\delta^{18}\text{O}$  (‰)

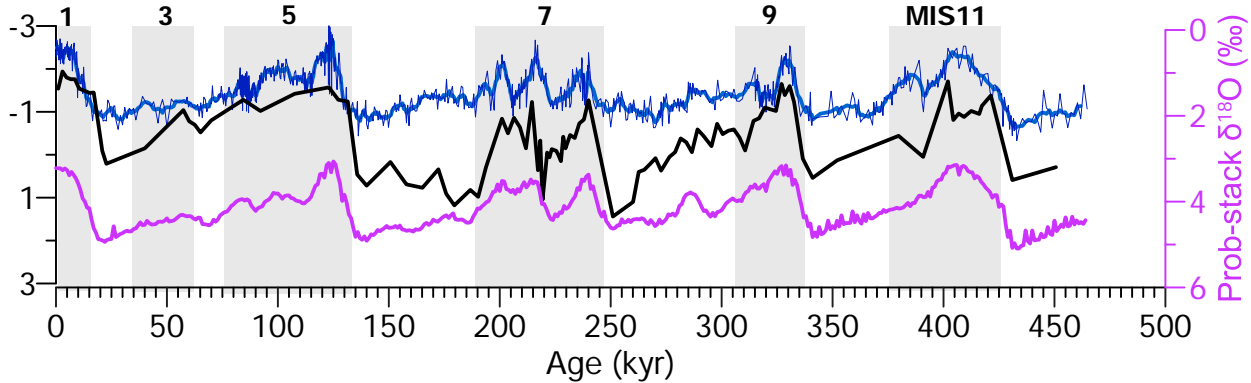

Supplement: Supplementary file 1 [file Supplementary Figure 1.pdf › Submission - Supplementary PDF Figures/Supplementary Figure 1.pdf]

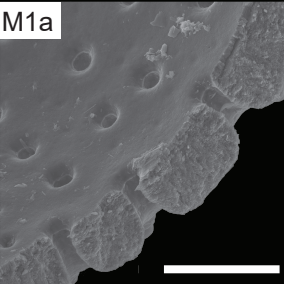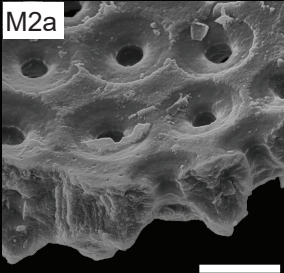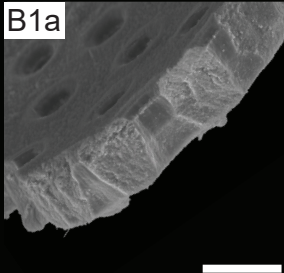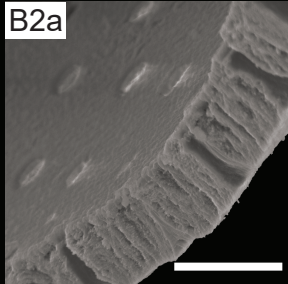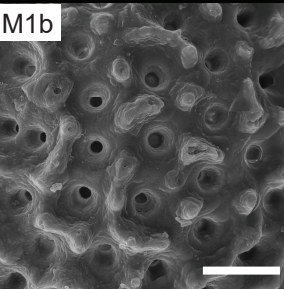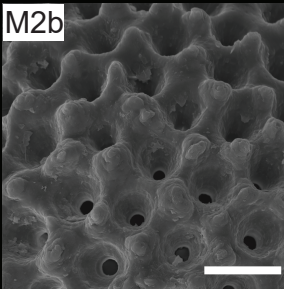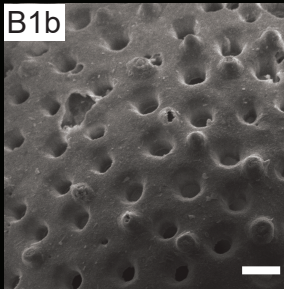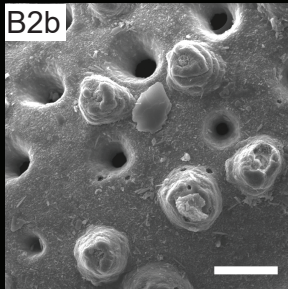

Supplement: Supplementary file 3 [file Supplementary Figure 3.pdf › Submission - Supplementary PDF Figures/Supplementary Figure 3.pdf]

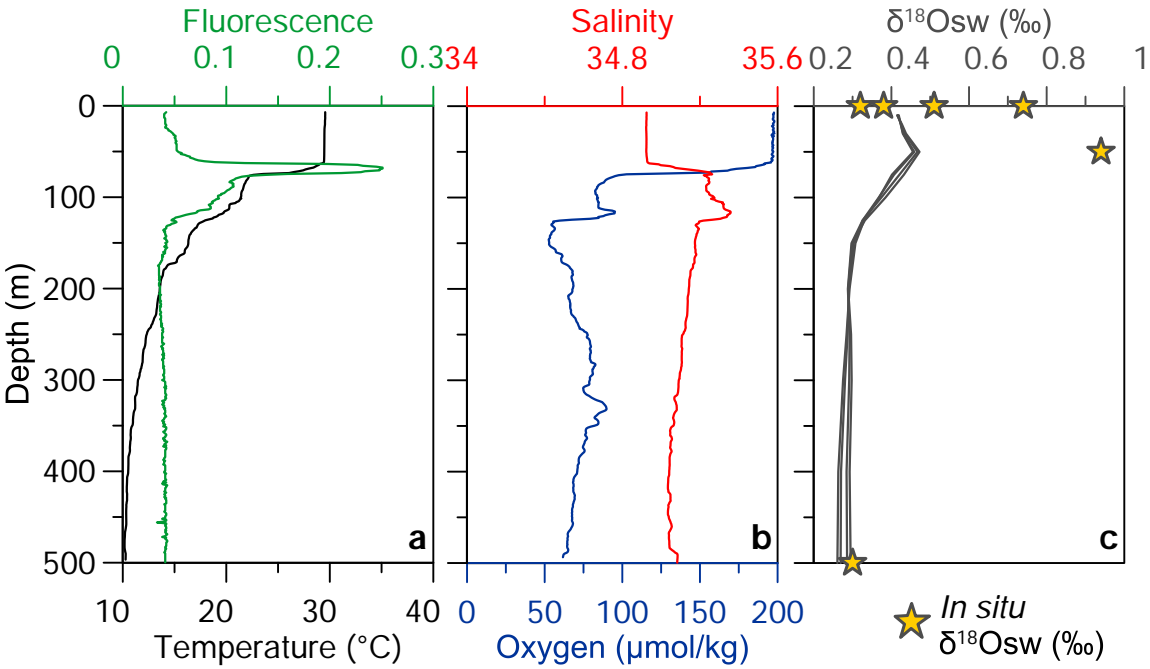

Supplement: Supplementary file 4 [file Supplementary Figure 4.pdf › Submission - Supplementary PDF Figures/Supplementary Figure 4.pdf]
